# Supplementary material for: Exploring the Role of Active Functional Microbiota in Flavor Generation by Integrated Metatranscriptomics and Metabolomics during Niulanshan Baijiu Fermentation
Source: MDPI journal article supplement (doi:10.3390/foods12224140), 2023-11-15
Supplement: s1 [file s1]

## SUPPLEMENTARY MATERIALS

### **Exploring the role of active functional microbiota in flavor generation by integrated metatranscriptomics and metabolomics during Niulanshan baijiu fermentation**

Yuanyuan Pan <sup>1,†</sup>, Ying Wang <sup>2,†</sup>, Wenjun Hao <sup>2</sup>, Sen Zhou <sup>2</sup>, Chengbao Duan <sup>1,3</sup>, Qiushi Li <sup>1,3</sup>, Jinwang Wei <sup>2,\*</sup> and Gang Liu <sup>1,3,\*</sup>

<sup>1</sup> State Key Laboratory of Mycology, Institute of Microbiology, Chinese Academy of Sciences, Beijing 100101, China; panyy@im.ac.cn (Y.P.); 18813111804@163.com (C.D.); liqiushi192@mails.ucas.ac.cn (Q.L.)

<sup>2</sup> Niulanshan Distillery, Beijing Shunxin Agriculture Company Limited, Beijing 101301, China; wangying.2006h@163.com (Y.W.); hwj1983hwj@126.com (W.H.); ak19861118ka@126.com (S.Z.)

<sup>3</sup> University of Chinese Academy of Sciences, Beijing 100049, China

\* Correspondence: weijinwang1971@163.com (J.W.); liug@im.ac.cn (G.L.)

† These authors contributed equally to this work.

## Supplementary Tables

**Table S1.** Numbers of genera and species in fermented grains based on the metatranscriptomic sequencing.

|        | Genera |    |    |     |     | Species |    |    |     |     |
|--------|--------|----|----|-----|-----|---------|----|----|-----|-----|
|        | D0     | D6 | D8 | D16 | D27 | D0      | D6 | D8 | D16 | D27 |
| > 0.1% | 39     | 25 | 21 | 29  | 26  | 59      | 41 | 37 | 50  | 45  |
| > 1%   | 14     | 9  | 10 | 8   | 9   | 19      | 12 | 13 | 11  | 12  |

**Table S2.** 395 polar compounds identified by LC-MS during NLS fermentation.

| No | compounds                                    | No  | compounds                                |
|----|----------------------------------------------|-----|------------------------------------------|
|    | <b>Amino acids</b>                           | 201 | Mannitol 1-phosphate                     |
| 1  | beta-Alanine                                 | 202 | Arbutin                                  |
| 2  | 2-Aminoacrylic acid                          | 203 | N-Acetylmuramate                         |
| 3  | 4-Aminobutyraldehyde                         | 204 | N-Acetyl-alpha-D-glucosamine 1-phosphate |
| 4  | Sarcosine                                    | 205 | Ribose 1,5-bisphosphate                  |
| 5  | 1-Aminocyclopropanecarboxylic acid           | 206 | Sucrose                                  |
| 6  | L-Serine                                     | 207 | Cellobiose                               |
| 7  | gamma-Aminobutyric acid                      | 208 | D-Maltose                                |
| 8  | 2-Phenylethanol                              | 209 | Trehalose                                |
| 9  | p-Cresol                                     | 210 | Digalacturonate                          |
| 10 | Pyrrole-2-carboxylic acid                    | 211 | Trehalose 6-phosphate                    |
| 11 | Imidazole-4-acetaldehyde                     | 212 | Stachyose                                |
| 12 | Histamine                                    | 213 | R-Methylmalonyl-CoA                      |
| 13 | Creatinine                                   |     | <b>Cofactors and vitamins</b>            |
| 14 | (S)-1-Pyrroline-5-carboxylate                | 214 | Niacinamide                              |
| 15 | 1-Pyrroline-2-carboxylic acid                | 215 | Nicotinic acid                           |
| 16 | L-Proline                                    | 216 | Gamma-delta-Dioxovaleric acid            |
| 17 | 5-Aminopentanoic acid                        | 217 | p-Aminobenzoic acid                      |
| 18 | Guanidoacetic acid                           | 218 | 6-Hydroxynicotinic acid                  |
| 19 | Methylmalonic acid                           | 219 | 5-(2-Hydroxyethyl)-4-methylthiazole      |
| 20 | Indole                                       | 220 | Methylitaconate                          |
| 21 | Betaine                                      | 221 | Maleic acid homopolymer                  |
| 22 | L-Valine                                     | 222 | 2-Dehydropantoate                        |
| 23 | Phenylacetaldehyde                           | 223 | Pimelic acid                             |
| 24 | L-Allothreonine                              | 224 | Quinolinic acid                          |
| 25 | L-Threonine                                  | 225 | Homogentisic acid                        |
| 26 | Phenylethylamine                             | 226 | Pyridoxamine                             |
| 27 | Picolinic acid                               | 227 | Pyridoxine                               |
| 28 | Ciliatine                                    | 228 | Ascorbate                                |
| 29 | (S)-2,3,4,5-tetrahydropyridine-2-carboxylate | 229 | L-Gulonolactone                          |
| 30 | Creatine                                     | 230 | 4-Pyridoxic acid                         |
| 31 | Pyrrolidonecarboxylic acid                   | 231 | 8-Amino-7-oxononanoate                   |
| 32 | Pyroglutamic acid                            | 232 | Diketogulonic acid                       |
| 33 | L-Pipecolic acid                             | 233 | Galactaric acid                          |
| 34 | L-Glutamic gamma-semialdehyde                | 234 | Dethiobiotin                             |
| 35 | 5-Amino-2-oxopentanoic acid                  | 235 | Pantothenic acid                         |
| 36 | Glutaric acid                                | 236 | Pyrimidodiazepine                        |
| 37 | Ureidopropionic acid                         | 237 | 4-Amino-4-deoxychorismate                |
| 38 | L-Leucine                                    | 238 | Porphobilinogen                          |

|    |                                 |     |                                                                 |
|----|---------------------------------|-----|-----------------------------------------------------------------|
| 39 | cis-4-Hydroxy-D-proline         | 239 | Biotin                                                          |
| 40 | 3-Methylindole                  | 240 | Lumichrome                                                      |
| 41 | N-Carbamoylputrescine           | 241 | Nicotinate D-ribonucleoside                                     |
| 42 | L-Isoleucine                    | 242 | 4-(beta-D-Glucosyloxy)benzoate                                  |
| 43 | L-Asparagine                    | 243 | D-4-Phosphopantothenate                                         |
| 44 | Ornithine                       | 244 | 2,5-Diamino-6-(5-phospho-D-<br>ribosylamino)pyrimidin-4(3H)-one |
| 45 | L-Aspartic acid                 | 245 | Riboflavin                                                      |
| 46 | Phenylacetic acid               | 246 | S-Adenosylmethionine                                            |
| 47 | 3-Hydroxyanthranilic acid       | 247 | Folic acid                                                      |
| 48 | 4-Hydroxyphenylacetaldehyde     | 248 | 13(1)-Oxo-magnesium-protoporphyrin IX<br>13-monomethyl ester    |
| 49 | 2-Phenylacetamide               |     | <b>Energy</b>                                                   |
| 50 | 2-Aminobenzoic acid             | 249 | Dimethyl sulfone                                                |
| 51 | Tyramine                        | 250 | Hydrogen phosphate                                              |
| 52 | Gentisate aldehyde              | 251 | 3-Methylthiopropionic acid                                      |
| 53 | Urocanic acid                   | 252 | N-methyl-L-glutamic Acid                                        |
| 54 | Ectoine                         | 253 | Pyrophosphate                                                   |
| 55 | Spermidine                      | 254 | Fructose 1,6-bisphosphate                                       |
| 56 | 2-Keto-glutaramic acid          |     | <b>Lipid</b>                                                    |
| 57 | 4-Oxoglutaramate                | 255 | Acetoacetic acid                                                |
| 58 | 2-Keto-6-aminocaproate          | 256 | Butyric acid                                                    |
| 59 | 4-Guanidinobutanoic acid        | 257 | Glycerol                                                        |
| 60 | (2R,5S)-2,5-Diaminohexanoate    | 258 | Malonate                                                        |
| 61 | L-Glutamine                     | 259 | 2-Hydroxybutyric acid                                           |
| 62 | L-Lysine                        | 260 | Maltol                                                          |
| 63 | (3S)-3,6-Diaminohexanoate       | 261 | O-Phosphoethanolamine                                           |
| 64 | trans-Cinnamate                 | 262 | Caprylic acid                                                   |
| 65 | L-Glutamic acid                 | 263 | Acetylcholine                                                   |
| 66 | O-Acetylserine                  | 264 | L-2-Hydroxyglutaric acid                                        |
| 67 | 1-Phenyl-1,2-propanedione       | 265 | 2-Oxo-4-methylthiobutanoic acid                                 |
| 68 | L-Methionine                    | 266 | (+)-(S)-Carvone                                                 |
| 69 | 3,4-Dihydroxyphenylglycol       | 267 | Perillyl aldehyde                                               |
| 70 | 3,4-Dihydroxyphenylacetaldehyde | 268 | rac-Glycerol 3-phosphoate                                       |
| 71 | Ortho-Hydroxyphenylacetic acid  | 269 | Limonene-1,2-diol                                               |
| 72 | Vanillin                        | 270 | Phosphorylcholine                                               |
| 73 | L-Histidine                     | 271 | Dodecanoic acid                                                 |
| 74 | Gentisic acid                   | 272 | (+)-7-Isojasmonic acid                                          |
| 75 | 3-Indoleacetonitrile            | 273 | Jasmonic acid                                                   |
| 76 | Isopropylmaleate                | 274 | Capsidiol                                                       |
| 77 | 5-Acetamidovalerate             | 275 | 2-trans,6-trans-Farnesal                                        |
| 78 | Indoleacetaldehyde              | 276 | Methyl jasmonate                                                |
| 79 | Oxoadipic acid                  | 277 | Traumatic Acid                                                  |
| 80 | Tryptophanol                    | 278 | Myristic acid                                                   |

|     |                                        |     |                                       |
|-----|----------------------------------------|-----|---------------------------------------|
| 81  | D-4-Hydroxy-2-oxoglutarate             | 279 | 1-Hexadecanol                         |
| 82  | Phenylpyruvic acid                     | 280 | Xanthoxin                             |
| 83  | m-Coumaric acid                        | 281 | Abscisic alcohol                      |
| 84  | Formylanthranilic acid                 | 282 | Palmitic acid                         |
| 85  | L-Methionine S-oxide                   | 283 | Glycerophosphocholine                 |
| 86  | D-Phenyllactic acid                    | 284 | (S)-Abscisic acid                     |
| 87  | L-Phenylalanine                        | 285 | Xanthoxic acid                        |
| 88  | 3,4-Dihydroxybenzeneacetic acid        | 286 | Stearic acid                          |
| 89  | 1-Methylhistidine                      | 287 | Stearidonic acid                      |
| 90  | Norepinephrine                         | 288 | Alpha-Linolenic acid                  |
| 91  | Tetrahydrodipicolinate                 | 289 | Linoleic acid                         |
| 92  | 3-Dehydroshikimate                     | 290 | Oleic acid                            |
| 93  | N-Acetyl-L-glutamate 5-semialdehyde    | 291 | Sphingosine                           |
| 94  | 1H-Indole-3-acetamide                  | 292 | 9(S)-HPOT                             |
| 95  | N-Acetylmethionine                     | 293 | 12-OPDA                               |
| 96  | L-Arginine                             | 294 | 13(S)-HpOTrE                          |
| 97  | N-Formyl-L-methionine                  | 295 | 3-Dehydrosphinganine                  |
| 98  | Citrulline                             | 296 | Sphinganine                           |
| 99  | Hippuric acid                          | 297 | 19(S)-HETE                            |
| 100 | 4-Hydroxyphenylpyruvic acid            | 298 | Arachidonic acid                      |
| 101 | L-Homophenylalanine                    | 299 | 2,3-Dinor-8-iso prostaglandin F2alpha |
| 102 | 3,4-Dihydroxyhydrocinnamic acid        | 300 | Phytosphingosine                      |
| 103 | (R)-3-(4-Hydroxyphenyl)lactate         | 301 | 5-KETE                                |
| 104 | Beta-Tyrosine                          | 302 | 12-Keto-tetrahydro-leukotriene B4     |
| 105 | L-Tyrosine                             | 303 | 12-KETE                               |
| 106 | Homovanillic acid                      | 304 | Prostaglandin E2                      |
| 107 | Se-Methylselenocysteine                | 305 | Prostaglandin-c2                      |
| 108 | Epinephrine                            | 306 | 8,9-DiHETrE                           |
| 109 | 3,4-Dihydroxymandelic acid             | 307 | 6-Ketoprostaglandin E1                |
| 110 | Normetanephrine                        | 308 | Prostaglandin G2                      |
| 111 | Phosphohydroxypyruvic acid             | 309 | Lithocholic acid                      |
| 112 | Phosphoserine                          | 310 | Cholesterol                           |
| 113 | Vanylglycol                            | 311 | Deoxycholic acid                      |
| 114 | Kynurenic acid                         | 312 | 3-Keto-4-methylzymosterol             |
| 115 | 2-Keto-6-acetamidocaproate             | 313 | Lanosterin                            |
| 116 | N6-Acetyl-L-lysine                     | 314 | beta-Carotene                         |
| 117 | N-Acetylglutamic acid                  |     | <b>Nucleotide</b>                     |
| 118 | Diaminopimelic acid                    | 315 | Cytosine                              |
| 119 | 5-Hydroxyindoleacetic acid             | 316 | Uracil                                |
| 120 | Selenomethionine                       | 317 | Dihydrouracil                         |
| 121 | L-Dopa                                 | 318 | Thymine                               |
| 122 | gamma-Glutamyl-beta-aminopropionitrile | 319 | (R)-5,6-Dihydrothymine                |
| 123 | 4-Fumarylacetoacetate                  | 320 | Oxalureate                            |

|     |                                                   |     |                                  |
|-----|---------------------------------------------------|-----|----------------------------------|
| 124 | Xanthurenic acid                                  | 321 | Adenine                          |
| 125 | L-Tryptophan                                      | 322 | Hypoxanthine                     |
| 126 | 4-(2-Aminophenyl)-2,4-dioxobutanoic acid          | 323 | 5-Methylbarbiturate              |
| 127 | N-Acetyl-L-phenylalanine                          | 324 | Guanine                          |
| 128 | L-Kynurenine                                      | 325 | Xanthine                         |
| 129 | N-Acetyldemethylphosphinothricin                  | 326 | 4,5-Dihydroorotic acid           |
| 130 | 2-Hydroxy-6-ketonoatrienedioate                   | 327 | Uric acid                        |
| 131 | beta-Alanyl-L-lysine                              | 328 | Deoxyuridine                     |
| 132 | gamma-Glutamylalanine                             | 329 | Cytidine                         |
| 133 | D-Lysopine                                        | 330 | Thymidine                        |
| 134 | L-Cystine                                         | 331 | Pseudouridine                    |
| 135 | 5-(Methylthio)-2,3-dioxopentyl phosphate          | 332 | Uridine                          |
| 136 | beta-Alanyl-L-arginine                            | 333 | 2-Deoxyadenosine                 |
| 137 | D-Octopine                                        | 334 | Inosine                          |
| 138 | Linatine                                          | 335 | Adenosine                        |
| 139 | 5-Methylthioribulose 1-phosphate                  | 336 | Deoxyguanosine                   |
| 140 | Subaphylline                                      | 337 | Guanosine                        |
| 141 | (2R,3R)-3-Methylglutamyl-5-semialdehyde-N6-lysine | 338 | Xanthosine                       |
| 142 | N2-Succinyl-L-arginine                            | 339 | dGMP                             |
| 143 | 4-Hydroxycinnamoylagmatine                        | 340 | 3-AMP                            |
| 144 | Saccharopine                                      | 341 | AMP                              |
| 145 | N-Succinyl-2-amino-6-ketopimelate                 |     | <b>Peptide</b>                   |
| 146 | Glutathione                                       | 342 | Carnosine                        |
| 147 | S-Adenosylhomocysteine                            |     | <b>Unknown</b>                   |
|     | <b>Carbohydrate</b>                               | 343 | 2-Methyl-3-oxopropanoic acid     |
| 148 | 3-Butyrate                                        | 344 | 5-Aminopentanal                  |
| 149 | Pyruvic acid                                      | 345 | D-1-Piperidine-2-carboxylic acid |
| 150 | Diacetyl                                          | 346 | 3-Amino-4-hydroxybenzoate        |
| 151 | L-Lactic acid                                     | 347 | L-4-Hydroxyphenylglycine         |
| 152 | Maleic acid                                       | 348 | Choline sulfate                  |
| 153 | Succinic acid semialdehyde                        | 349 | D-Arabinose 5-phosphate          |
| 154 | 2-Ketobutyric acid                                | 350 | 3-Deoxy-D-manno-octulosonate     |
| 155 | (R)-3-Hydroxybutyric acid                         |     | <b>Xenobiotics</b>               |
| 156 | Glyceric acid                                     | 351 | Cyclopropanecarboxylate          |
| 157 | Fumaric acid                                      | 352 | m-Cresol                         |
| 158 | Succinic acid                                     | 353 | Phenol                           |
| 159 | Deoxyribose                                       | 354 | Aniline                          |
| 160 | Itaconic acid                                     | 355 | Sulfate                          |
| 161 | Mesaconate                                        | 356 | Benzaldehyde                     |
| 162 | Citraconic acid                                   | 357 | Catechol                         |
| 163 | L-Malic acid                                      | 358 | Hydroquinone                     |
| 164 | Acetylphosphate                                   | 359 | 2-Aminophenol                    |

---

|            |                            |            |                                     |
|------------|----------------------------|------------|-------------------------------------|
| <b>165</b> | L-Fucose                   | <b>360</b> | 4-Aminophenol                       |
| <b>166</b> | Oxoglutaric acid           | <b>361</b> | Epsilon-caprolactam                 |
| <b>167</b> | D-Xylonate                 | <b>362</b> | epsilon-Caprolactone                |
| <b>168</b> | D-Ribose                   | <b>363</b> | 3-Hydroxybenzoic acid               |
| <b>169</b> | D-Xylose                   | <b>364</b> | 4-Methylbenzaldehyde                |
| <b>170</b> | D-Lyxose                   | <b>365</b> | Benzoate                            |
| <b>171</b> | Tartaric acid              | <b>366</b> | 3-Hydroxybenzyl alcohol glucoside   |
| <b>172</b> | L-Arabinose                | <b>367</b> | 4-Methylcatechol                    |
| <b>173</b> | L-Arabitol                 | <b>368</b> | 2-Hydroxybenzaldehyde               |
| <b>174</b> | D-Xylitol                  | <b>369</b> | 3-Hydroxybenzaldehyde               |
| <b>175</b> | Ribitol                    | <b>370</b> | Erythritol                          |
| <b>176</b> | 2-Hydroxy-3-oxoadipate     | <b>371</b> | 4-Aminocatechol                     |
| <b>177</b> | Alpha-D-Glucose            | <b>372</b> | Aminohydroquinone                   |
| <b>178</b> | L-Rhamnono-1,4-lactone     | <b>373</b> | 1,2,3-Trihydroxybenzene             |
| <b>179</b> | D-Fructose                 | <b>374</b> | 1,3,5-Trihydroxybenzene             |
| <b>180</b> | L-Rhamnofuranose           | <b>375</b> | Adipate semialdehyde                |
| <b>181</b> | Gluconolactone             | <b>376</b> | Aminocaproic acid                   |
| <b>182</b> | Galactonic acid            | <b>377</b> | m-toluate                           |
| <b>183</b> | Glucosamine                | <b>378</b> | (R)-mandelic Acid                   |
| <b>184</b> | Allose                     | <b>380</b> | 4-Hydroxybenzoic acid               |
| <b>185</b> | D-Mannose                  | <b>381</b> | Salicylic acid                      |
| <b>186</b> | L-Sorbose                  | <b>382</b> | 2-Methylbenzoic acid                |
| <b>187</b> | myo-Inositol               | <b>383</b> | Cuminaldehyde                       |
| <b>188</b> | Galactitol                 | <b>384</b> | 3-Hydroxyphenylacetic acid          |
| <b>189</b> | Sorbitol                   | <b>385</b> | 2-Pyrocatechuic acid                |
| <b>190</b> | Mannitol                   | <b>386</b> | Protocatechuic acid                 |
| <b>191</b> | Citric acid                | <b>387</b> | 3-Oxoadipic acid                    |
| <b>192</b> | Isocitric acid             | <b>388</b> | cis-1,2-Dihydronaphthalene-1,2-diol |
| <b>193</b> | D-Glucuronic Acid          | <b>389</b> | 4-Hydroxycinnamic acid              |
| <b>194</b> | Gluconic acid              | <b>390</b> | Gallic acid                         |
| <b>195</b> | N-Acetyl-D-glucosamine     | <b>391</b> | (S)-4-Hydroxymandelate              |
| <b>196</b> | Inositol phosphate         | <b>392</b> | 1-Hydroxy-2-naphthoate              |
| <b>197</b> | D-Mannose 1-phosphate      | <b>393</b> | 2,4-Dinitrotoluene                  |
| <b>198</b> | Glucose 6-phosphate        | <b>394</b> | Syringic acid                       |
| <b>199</b> | Fructose 6-phosphate       | <b>395</b> | 5-Carboxyvanillic acid              |
| <b>200</b> | Beta-D-Glucose 6-phosphate |            |                                     |

---

**Table S3.** 83 compounds identified by derivative GC-MS during NLS fermentation.

| No | compounds                       | No | compounds                       |
|----|---------------------------------|----|---------------------------------|
|    | <b>amine</b>                    | 43 | Quinic acid                     |
| 1  | Ethanolamine                    | 44 | Ribonic acid                    |
| 2  | Histamine                       | 45 | Shikimic acid                   |
|    | <b>Amino acids</b>              | 46 | Succinic acid                   |
| 3  | 2-Aminobutyric acid             | 47 | Threonic acid                   |
| 4  | 4-Aminobutyric acid             | 48 | Trans-Ferulic acid              |
| 5  | Alanine                         | 49 | 2,4-Dihydroxybutanoic acid      |
| 6  | Asparagine                      | 50 | 4-Hydroxy-3-Methoxybenzoic acid |
| 7  | Aspartic acid                   | 51 | 4-Hydroxybutanoic acid          |
| 8  | Beta-Alanine                    | 52 | DL-Beta-Hydroxybutyric acid     |
| 9  | Glutamic acid                   |    | <b>Others</b>                   |
| 10 | Glutamine                       | 53 | Adenosine                       |
| 11 | Glycine                         | 54 | Threonic acid-1,4-Lactone       |
| 12 | Isoleucine                      | 55 | Uracil                          |
| 13 | Leucine                         | 56 | Urea                            |
| 14 | Lysine                          | 57 | Uridine                         |
| 15 | Methionine                      | 58 | Hypoxanthine                    |
| 16 | Phenylalanine                   | 59 | Thymine                         |
| 17 | Proline                         |    | <b>Phosphoric acid</b>          |
| 18 | Pyroglutamic acid               | 60 | Glucose-6-Phosphate             |
| 19 | Serine                          | 61 | Glycerol-3-Phosphate            |
| 20 | Threonine                       | 62 | Monomethylphosphate             |
| 21 | Tyrosine                        | 63 | Myo-Inositol-1-Phosphate        |
| 22 | Valine                          | 64 | Phosphoric acid                 |
| 23 | Ornithine                       | 65 | Fructose-6-Phosphate            |
|    | <b>Fatty acid</b>               | 66 | Sorbitol-6-Phosphate            |
| 24 | Heptanoic acid                  |    | <b>Polyol</b>                   |
| 25 | Hexadecanoic acid               | 67 | Erythritol                      |
| 26 | Octadecanoic acid               | 68 | Glycerol                        |
| 27 | 9-(Z)-Octadecenoic acid         | 69 | Mannitol                        |
| 28 | 9,12-(Z,Z)-Octadecadienoic acid | 70 | Myo-Inositol                    |
|    | <b>Organic acid</b>             | 71 | Sorbitol                        |
| 29 | 2-Hydroxyglutaric acid          | 72 | 1-Monohexadecanoylglycerol      |
| 30 | 2-Keto-L-Gluconic acid          | 73 | Ribitol                         |
| 31 | Citric acid                     | 74 | Threitol                        |
| 32 | Erythronic acid                 |    | <b>Sugar</b>                    |
| 33 | Fumaric acid                    | 75 | Fructose                        |
| 34 | Galactaric acid                 | 76 | Galactose                       |
| 35 | Glyceric acid                   | 77 | Glucose                         |
| 36 | Glycolic acid                   | 78 | Maltose                         |
| 37 | Lactic acid                     | 79 | Ribose                          |



---

|           |                |           |             |
|-----------|----------------|-----------|-------------|
| <b>38</b> | Malic acid     | <b>80</b> | Sucrose     |
| <b>39</b> | Nicotinic acid | <b>81</b> | Trehalose   |
| <b>40</b> | Oxalic acid    | <b>82</b> | Fucose      |
| <b>41</b> | Parabanic acid | <b>83</b> | Gentiobiose |
| <b>42</b> | Pyruvic acid   |           |             |

---

**Table S4.** 181 VOCs identified by HS-SPME-GC-MS during NLS fermentation.

| No | compounds                                                    | No  | compounds                                                        |
|----|--------------------------------------------------------------|-----|------------------------------------------------------------------|
|    | <b>Esters</b>                                                | 93  | 1-Octen-3-ol                                                     |
| 1  | Nonoic acid, 2,4,6-trimethyl-, methyl ester, (2R,4S,6R)-(-)- | 94  | 1,1,3,3,5,5,7,7-Octamethyl-7-(2-methylpropoxy)tetrakisloxan-1-ol |
| 2  | Ethyl formate                                                | 95  | 2-Furanmethanol                                                  |
| 3  | Arsenous acid tris(trimethylsilyl) ester                     | 96  | 3-(Methylthio)-1-propanol                                        |
| 4  | Acetic ester                                                 | 97  | Benzyl alcohol                                                   |
| 5  | 2-Methylpropyl acetate                                       | 98  | Phenylethyl alcohol                                              |
| 6  | Ethyl butyrate                                               | 99  | 4aH-Cycloprop[e]azulen-4a-ol, decahydro-1,1,4,7-tetramethyl-     |
| 7  | Ethyl 2-methylbutyrate                                       | 100 | (-)-Epiglobulol                                                  |
| 8  | Ethyl isovalerate                                            | 101 | noethylene glycol                                                |
| 9  | Isoamyl acetate                                              | 102 | Prenol                                                           |
| 10 | Ethyl hexanoate                                              |     | <b>Ketones</b>                                                   |
| 11 | Sulfurous acid, butyl nonyl ester                            | 103 | 2,3-Butanedione                                                  |
| 12 | Pentyl formate                                               | 104 | 2,3-Pentanedione                                                 |
| 13 | Ethyl 5-methylhexanoate                                      | 105 | 4-Heptanone                                                      |
| 14 | Isoamyl isovalerate                                          | 106 | 2-Heptanone                                                      |
| 15 | Ethyl heptanoate                                             | 107 | 3-Octanone                                                       |
| 16 | Docosanoic acid, ethyl ester                                 | 108 | 2-Nonone                                                         |
| 17 | Ethyl lactate                                                |     | <b>Acids</b>                                                     |
| 18 | ethyl (2S)-lactate                                           | 109 | Acetate                                                          |
| 19 | 4-Heptenoic acid, ethyl ester, (E)-                          | 110 | Propanoic acid                                                   |
| 20 | Methyl caprylate                                             | 111 | Orsellite                                                        |
| 21 | Ethyl octanoate                                              | 112 | 3-Methylbutanoic acid                                            |
| 22 | 3-Methylbutyl hexanoate                                      | 113 | Hexanoic acid                                                    |
| 23 | Ethyl 4Z-octenoate                                           | 114 | Octanoic acid                                                    |
| 24 | Ethyl nonoate                                                | 115 | Octanoic acid, silver(1+) salt                                   |
| 25 | Ethyl dl-2-hydroxycaproate                                   | 116 | Lactic acid                                                      |
| 26 | n-Caprylic acid isobutyl ester                               | 117 | Linoleate                                                        |
| 27 | Octyl formate                                                |     | <b>Alkene</b>                                                    |
| 28 | Ethyl 3-(methylthio)propanoate                               | 118 | cis-2-Octene                                                     |
| 29 | 2-Methylpropanoate                                           | 119 | trans-3-Octene                                                   |
| 30 | Methoxyacetic acid, 3-methylbutyl ester                      | 120 | Styrene                                                          |
| 31 | Phosphonessigsaeure-tri-(trimethylsilylester)                | 121 | prehnitene                                                       |
| 32 | gamma-Butyrolactone                                          | 122 | Cyperene                                                         |
| 33 | 4-Decenoic acid, methyl ester                                | 123 | 1-Epi-bicyclosquiphellandrene                                    |
| 34 | Nonoic acid, 2,6-dimethyl-, methyl ester                     | 124 | Aristolene                                                       |
| 35 | Ethyl decanoate                                              | 125 | Berkheyaradulene                                                 |
| 36 | Ethyl 4-decenoate                                            | 126 | (-)-alpha-Gurjunene                                              |
| 37 | Diethyl succite                                              | 127 | beta-Caryophyllene                                               |

|    |                                                 |     |                                                                                        |
|----|-------------------------------------------------|-----|----------------------------------------------------------------------------------------|
| 38 | ethyl 9-decenoate                               | 128 | 2-Isopropenyl-4a,8-dimethyl-1,2,3,4,4a,5,6,8a-octahydrophthalene                       |
| 39 | Succinic acid, ethyl 2-methylphenyl ester       | 129 | Cedrene-V6                                                                             |
| 40 | Ethyl phenylacetate                             | 130 | valencene                                                                              |
| 41 |                                                 | 131 | (1R,4aS,8aS)-7-methyl-4-methylidene-1-propan-2-yl-2,3,4a,5,6,8a-hexahydro-1H-phthalene |
|    | Succinic acid, ethyl 3-heptyl ester             | 132 | alpha-muurolene                                                                        |
| 42 | 4-Ethylbenzoic acid, dodec-9-ynyl ester         | 133 | .gamma.-Elemene                                                                        |
| 43 | Phenethyl acetate                               | 134 | delta-Cadinene                                                                         |
| 44 | Methyl 3-phenylpropanoate                       | 135 | Caryophyllene epoxide                                                                  |
| 45 | Lauric Acid ethyl ester                         | 136 | Longifolene                                                                            |
| 46 | Ethyl 3-phenylpropanoate                        | 137 |                                                                                        |
| 47 | 1-O-ethyl 4-O-(3-methylbutyl) butanedioate      |     | gamma-gurjunene                                                                        |
| 48 | methyl 2-methyltetradecanoate                   |     | <b>Alkanes</b>                                                                         |
| 49 | Tetradecanoic acid, ethyl ester                 | 138 | 2,4-dimethylheptane                                                                    |
| 50 | Ethyl 13-methyl-tetradecanoate                  | 139 | Octamethyltrisiloxane                                                                  |
| 51 | Octadecanoic acid, 9-methyl-, ethyl ester       | 140 | Methylene chloride                                                                     |
| 52 | Ethyl cinmate                                   | 141 | 2,2,4,6,6-pentamethylheptane                                                           |
| 53 | Pentadecanoic acid, ethyl ester                 | 142 | N-Decane                                                                               |
| 54 |                                                 | 143 | trisiloxane, 1,1,1,5,5,5-hexamethyl-3-[(trimethylsilyl)oxy]-                           |
|    | (Z)-Ethyl pentadec-9-enoate                     | 144 | Decane, 3,7-dimethyl-                                                                  |
| 55 | Palmitic Acid ethyl ester                       | 145 | Undecane                                                                               |
| 56 | Methyl hexadec-9-enoate                         | 146 | Decamethyl-Tetrasiloxane                                                               |
| 57 | Ethyl 9-hexadecenoate                           | 147 | 3,8-Dimethyldecane                                                                     |
| 58 | Oxalic acid, pentyl 2-phenylethyl ester         | 148 | 3-methyl-Undecane                                                                      |
| 59 | methyl 17-methyloctadecanoate                   | 149 | Decamethylcyclopentasiloxane                                                           |
| 60 | Dihydroactinidiolide                            | 150 | Dodecane, 1-iodo-                                                                      |
| 61 | Heptadecanoic acid, ethyl ester                 | 151 | Dodecane                                                                               |
| 62 | (Z)-Ethyl heptadec-9-enoate                     | 152 | heptacosane                                                                            |
| 63 | Ethyl hydrogen succite                          | 153 | Eicosane, 1-iodo-                                                                      |
| 64 | Stearic Acid ethyl ester                        | 154 | Tridecane                                                                              |
| 65 | Oleic Acid ethyl ester                          | 155 | Heptadecane                                                                            |
| 66 | cis-10-Pentadecenoic acid, propyl ester         | 156 | tetradecane                                                                            |
| 67 | octadeca-9,12-dienoic acid ethyl ester          | 157 |                                                                                        |
| 68 | Phthalic acid, isobutyl 4-methylpent-2-yl ester |     | dodecamethylpentasiloxane                                                              |
| 69 |                                                 | 158 | 3-(1,3-Dihydroxyisopropyl)-1,5,8,11-tetraoxacyclotridecane                             |
|    | Linolenic Acid ethyl ester                      | 159 | 1,4,7,10,13,16-Hexaoxanodecane, 18-(2-propenyl)-                                       |
| 70 |                                                 |     | <b>Others</b>                                                                          |
|    | Ethyl 9.cis.,11.trans.-octadecadienoate         | 160 | Ether                                                                                  |
| 71 | Linoleic Acid ethyl ester                       | 161 | Benzene                                                                                |
| 72 | 7,10-Hexadecadienoic acid, methyl ester         |     |                                                                                        |
| 73 | n-Propyl 9,12-octadecadienoate                  |     |                                                                                        |



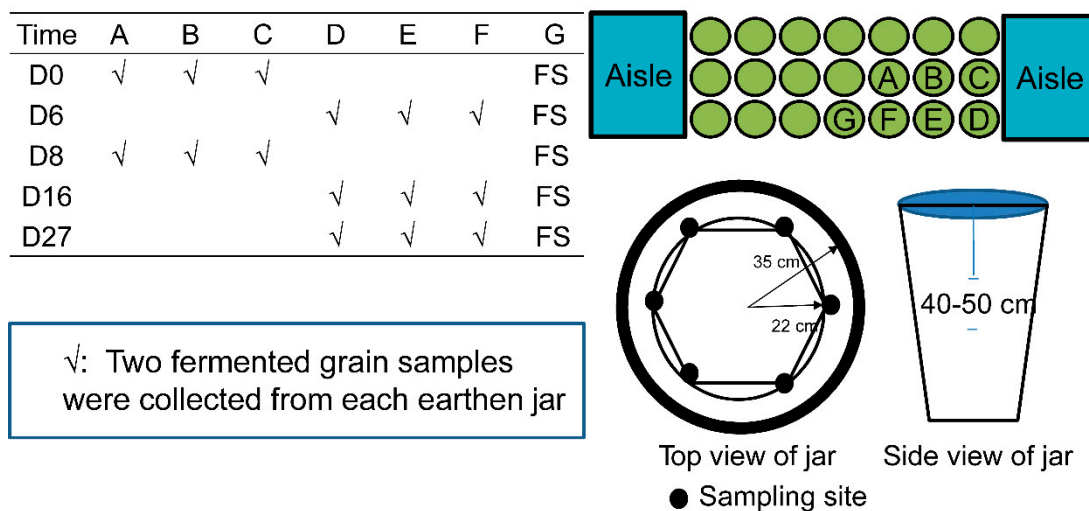

**Figure S1.** Fermentation time points and methods of sampling for untargeted metabolomics. D0 represents the samples isolated from the fermentation start time. Samples from A, B and C earthen jars were named as D0A, D0B and D0C, respectively. D6 represents the samples isolated from the 6 day of fermentation. Samples from D, E and F earthen jars were named as D6A, D6B and D6C, respectively. The following samples were named in the same way. Both fermented grain samples were collected from each earthen jar at the same time. Samples located between 40 and 50 cm in the earthen jars were collected and mixed well immediately for use, and then supply the same amount of feedstock from earthen jar G to the sampling spaces. FS, Feedstock supply earthen jar; cm, centimeter.

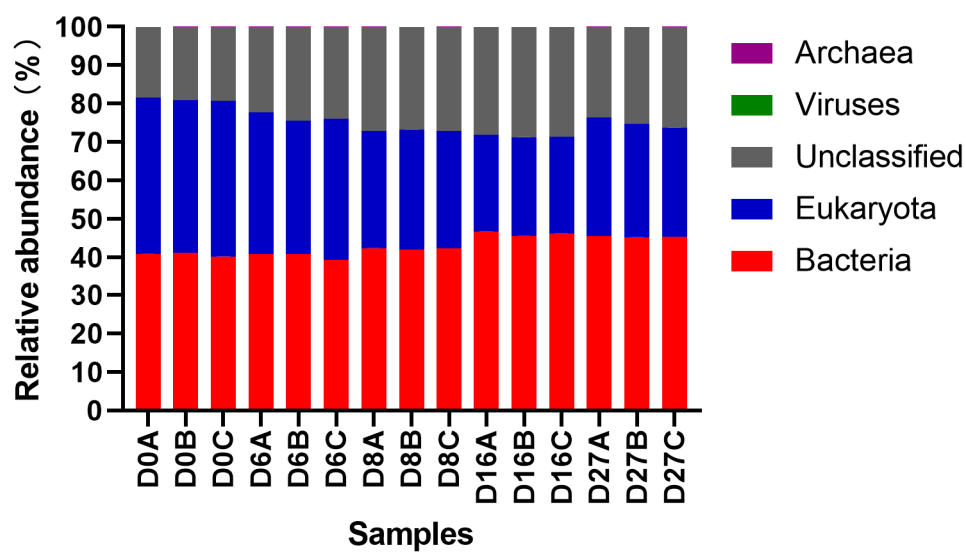

**Figure S2.** Distribution of microorganisms at the superkingdom level.

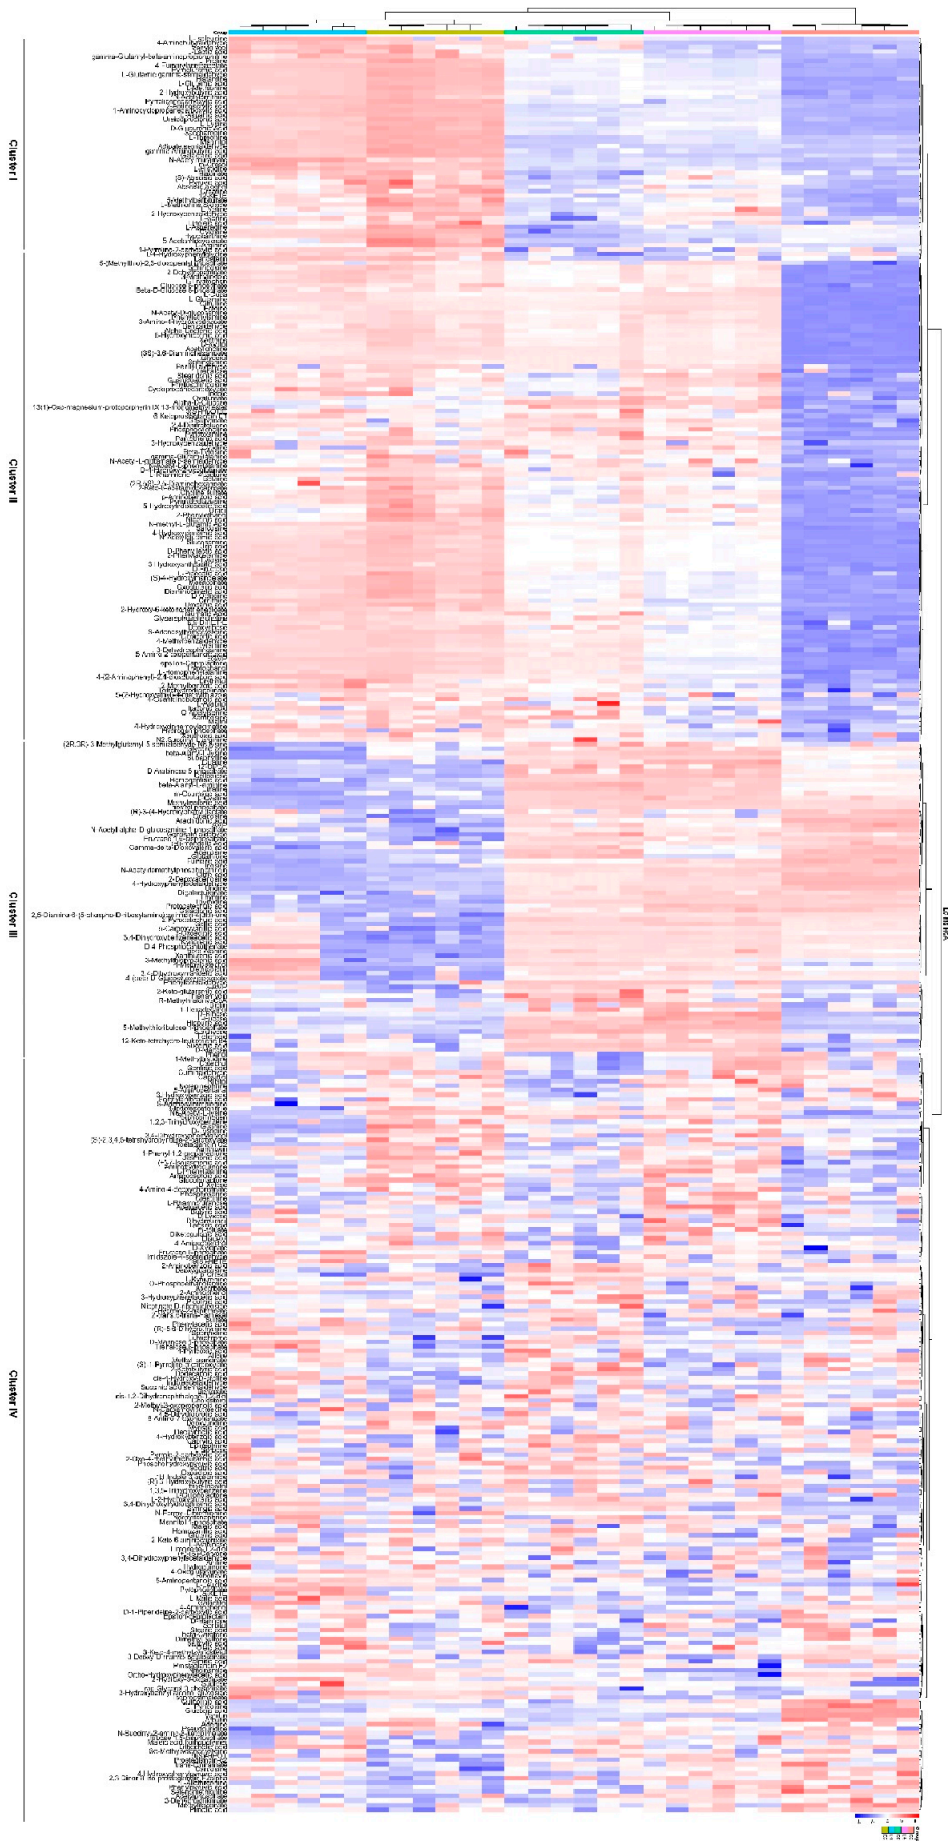

**Figure S3.** Hierarchical cluster analysis of compounds during NLS fermentation based on the LC-MS detection. Rows represent the compounds and columns from different batches. Color key indicates the relative abundance of different compounds, green indicates the lowest and red indicates the highest. D0, D6, D8, D16 and D27 represent the fermentation sample of 0, 6, 8, 16 and 27 days, respectively.



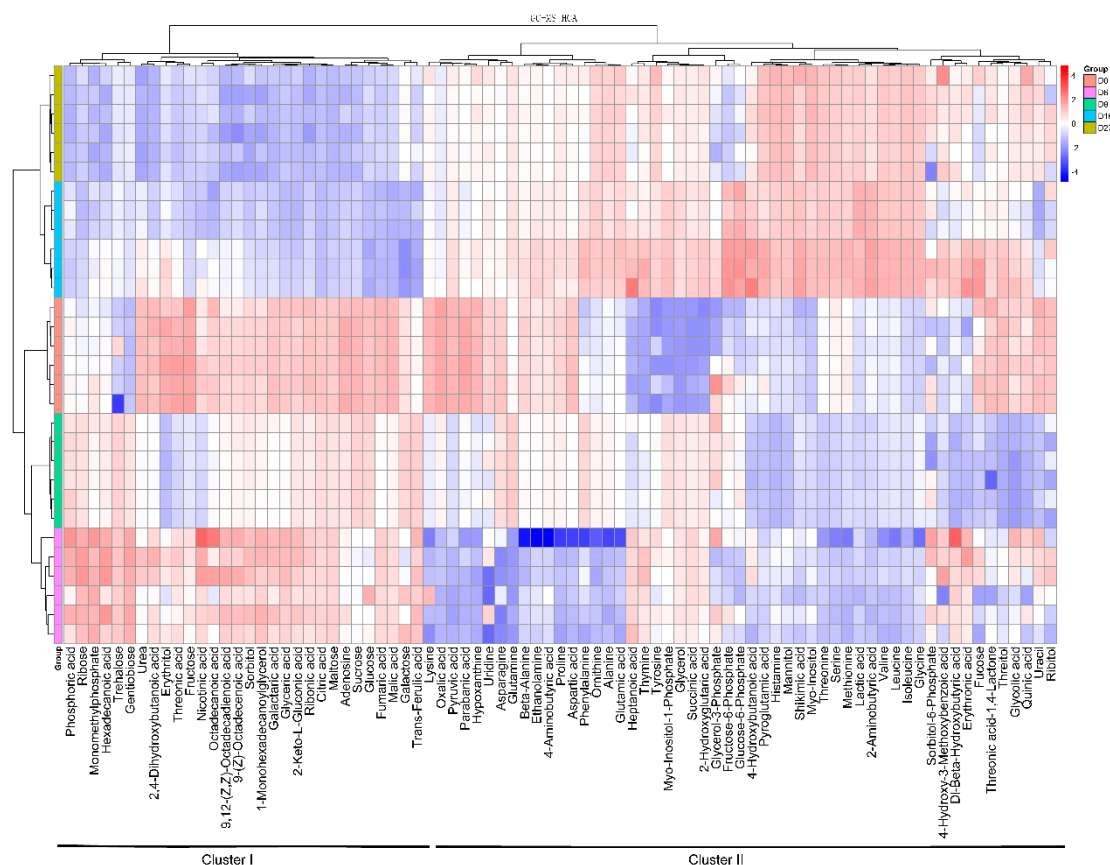

**Figure S4.** Hierarchical cluster analysis of compounds during NLS fermentation based on the GC-MS detection. Rows represent the compounds and columns represent different batches. Color key indicates the relative abundance of differential compounds, green indicates the lowest and red indicates the highest. D0, D6, D8, D16 and D27 represent the fermentation sample collected on 0, 6, 8, 16 and 27 day, respectively.



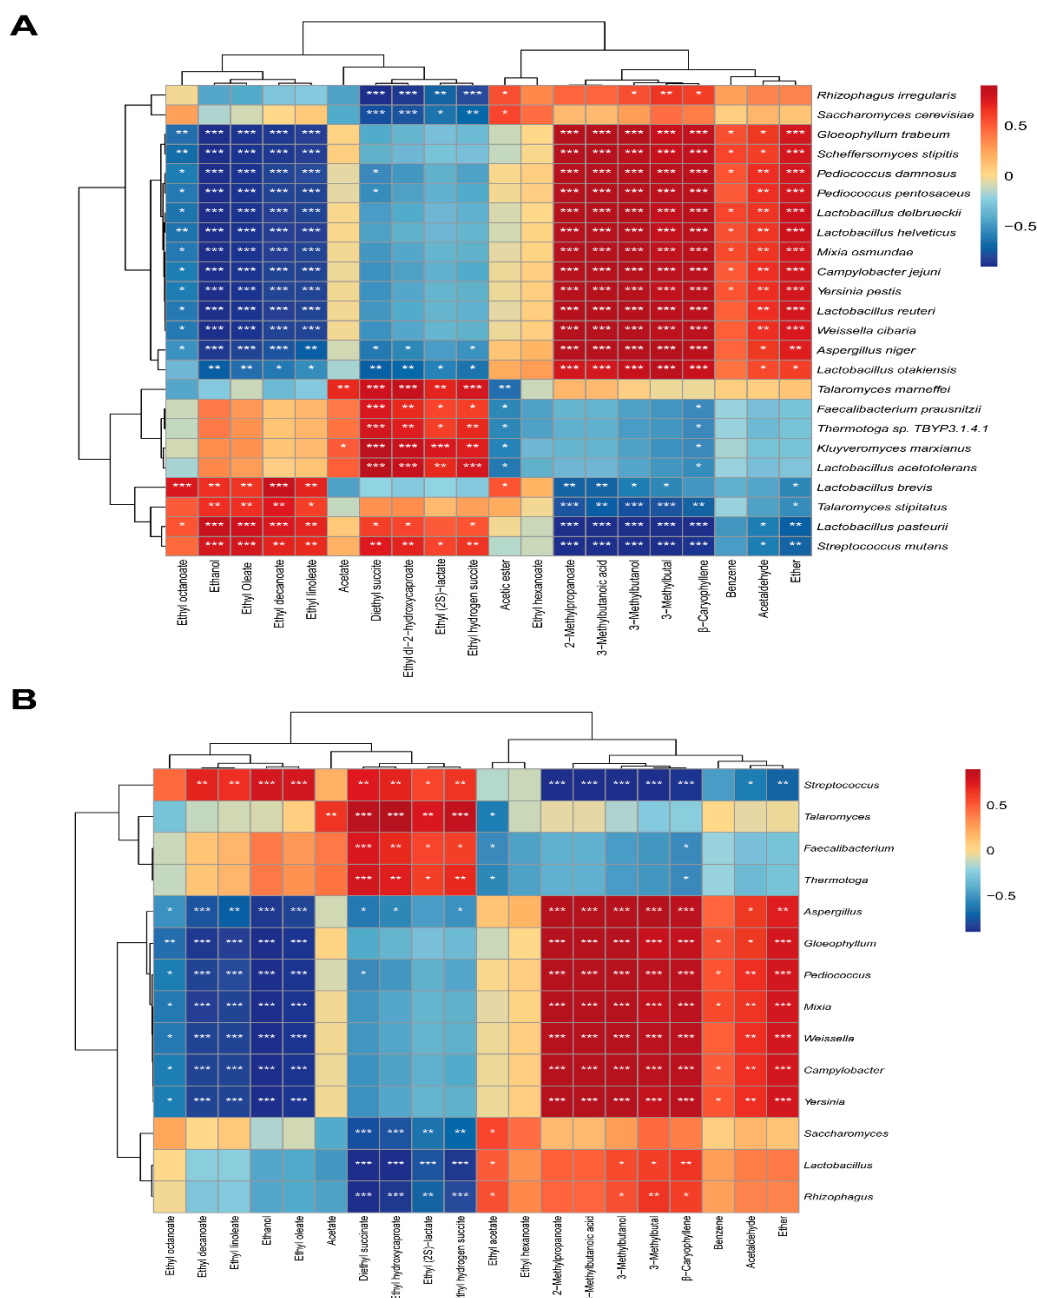

**Figure S6.** Correlation analysis between microbiota and volatile compounds by O2PLSDA model. (A) Statistical pearson's correlations between important genera (VIP > 1) and top 20 volatile compounds. (B) Statistical pearson's correlations between important species (VIP > 1) and top 20 volatile compounds. The correlated relationship with p-value < 0.05, 0.01, 0.001 was displayed by one, two and three asterisks, respectively.
